# Supplementary material for: ISMIP-HOM benchmark experiments using Underworld
Source: Copernicus journal article supplement (doi:10.5194/egusphere-2022-492), 2022-06-16
Supplement: Supplementary file 3 [file egusphere-2022-492-supplement.zip]

Archive with 3 entries (3 files):
- Results_and_Figures.pdf
- Results-all-simulations.zip
- Source-all-simulations.zip
